# Supplementary material
Source: PubMed Central journal article supplement (PMC2799885)
Supplement: 0912022106_Appendix_PDF.pdf [file 0912022106_Appendix_PDF.pdf]

# SI Appendix

## SI Methods

**Hippocampal slice preparation** Transverse hippocampal slices (300 - 350  $\mu\text{m}$  thick) were prepared from Sprague Dawley rats (postnatal day 16 - 21) in ice-cold artificial cerebrospinal fluid (ACSF) with a vibratome (model 3000, Vibratome, St. Louis, MO), and maintained at 34°C for 0.5 hr and then at room temperature (22 - 26°C). The ACSF contained (in mM): 119 NaCl, 3 KCl, 2 CaCl<sub>2</sub>, 1 MgSO<sub>4</sub>, 1.25 NaH<sub>2</sub>PO<sub>4</sub>, 26 NaHCO<sub>3</sub>, and 20 glucose, and was saturated with 95% O<sub>2</sub> and 5% CO<sub>2</sub> (pH 7.4). The animal use protocol was approved by the Animal Care and Use Committee of Shanghai Institutes for Biological Sciences, Chinese Academy of Sciences.

**Electrophysiology and iontophoresis** Electrophysiology experiments were performed in a submerged recording chamber that was perfused with ACSF (~ 2 ml/min) at 30 - 32°C. Neurons were visualized with an upright microscope (BX51WI, Olympus) equipped with an infrared camera (IR-1000, DAGE-MTI, Michigan City, IN). Whole-cell recording was made from the soma of CA1 pyramidal neurons. Recording pipettes were filled with the internal solution that contained (in mM): 130 K-gluconate, 7 KCl, 1 MgCl<sub>2</sub>, 10 HEPES, 10 phosphocreatine, 3 MgATP, 0.3 Tris<sub>2</sub>GTP and 0.1 EGTA (pH 7.3). Fluorescent dye Alexa Fluor 488 was loaded into the cell through the recording pipette to visualize the dendritic tree. Whole-cell recording pipettes had a resistance of 2.5 - 3.5 M $\Omega$  and during the recording the access resistance was normally smaller than 20 M $\Omega$ . Electrical signals were amplified and filtered at 1 KHz by a patch-clamp amplifier (Axopatch 200B, Molecular Devices, Union City, CA), digitalized by a DIGIDATA board (Model 1322A, Molecular Devices), acquired and analyzed by pClamp 9

(Molecular Devices) in a computer.

The iontophoretic method followed that described previously (1), with some modifications. The sharp iontophoretic pipette was filled with 150 mM glutamate (pH 8.0, adjusted with NaOH) or 350 mM GABA (pH 3.5, adjusted with HCl) and had a resistance of 150 - 300 M $\Omega$ . The pipette tip was coated with Sylgard-184 (Dow Corning, Midland, MI) to reduce the pipette capacitance. Both the holding current (1.5 - 2.0 nA) and iontophoretic current (10 - 100 nA, with a duration of 0.2 - 1.0 ms) were applied through a Multiclamp 700A amplifier (Molecular Devices) and the pipette capacitance was compensated by a built-in function of the amplifier. A Master-8 stimulator (AMPI, Israel) was used to control the duration, amplitude and onset timing of the iontophoretic current. The iontophoretic responses were highly sensitive to the proximity of the pipette tip to the dendrite, but were reproducible for a given location (Fig. S1A,B). For the response kinetics, the averaged 10-90% risetime for glutamate and GABA iontophoretic responses were  $8.2 \pm 1.7$  ms and  $13.8 \pm 2.8$  ms (mean  $\pm$  SD, n = 10), respectively, similarly to those of electrically evoked natural EPSP ( $6.7 \pm 2.5$  ms) and IPSP ( $11.4 \pm 3.5$  ms, mean  $\pm$  SD, n = 10). In both experiments and simulations, the driving force (the difference between the reversal potential and resting membrane potential) for the inhibitory input was fixed at -10 mV, in order to allow comparison of results from various experiments. Each measured response was averaged from 10 - 15 trials. All chemicals were from Sigma-Aldrich except that Alexa Fluor 488 was from Invitrogen.

**Realistic neuronal modeling** The reconstructed CA1 pyramidal neuron included 200 compartments and was obtained from Duke-Southampton Archive of neuronal morphology (2). The passive cable properties and the density and distribution of active conductances in the model

cell were based on published experimental data obtained from hippocampal and cortical pyramidal cells. The source code for our simulation model is available on the web (<http://www.ion.ac.cn/laboratories/zhangxiaohui/>).

For active conductances, the model neuron included voltage-gated sodium conductance  $g_{Na}$ , the delayed rectifier potassium conductance  $g_{Kd}$ , two variants of A-type potassium conductance  $g_{KA}^p$  and  $g_{KA}^d$  [applied to the proximal ( $< 100 \mu\text{m}$ ) and distal ( $> 100 \mu\text{m}$ ) dendrites, respectively], and the hyperpolarization-activated conductance  $g_h$ . It also contained AMPA, NMDA, GABA<sub>A</sub> and GABA<sub>B</sub> receptors, with kinetic properties described previously (3-5). AMPAR, NMDAR and GABA<sub>A</sub>R followed a first order kinetics of transmitter binding to the postsynaptic receptors  $\frac{dR}{dt} = \text{Alpha} * [\text{T}] * (1-R) - \text{Beta} * R$ , where  $R$  is the fraction of open receptors,  $\text{Alpha}$  and  $\text{Beta}$  are forward and backward rate constants for transmitter binding, and  $[\text{T}]$  is the transmitter concentration. The postsynaptic current is given by:  $I_{syn} = g * (V - E_{rev})$ , where  $V$  is the postsynaptic potential,  $E_{rev}$  the reversal potential, and  $g$  the synaptic conductance. For AMPAR and GABA<sub>A</sub>R,  $g = g_{max} * R$ , where  $g_{max}$  is the maximum synaptic conductance and for NMDAR,  $g = (g_{max} * R) / (1 + 0.33 * [\text{Mg}^{2+}] * \exp(- (0.06 * V)))$ , where  $[\text{Mg}^{2+}]$  is the extracellular magnesium concentration. For GABA<sub>B</sub>R, the kinetic equations are  $\frac{dR}{dt} = K_1 * [\text{T}] * (1-R) - K_2 * R$  and  $\frac{dG}{dt} = K_3 * R - K_4 * G$ , where  $K_1$  and  $K_2$ , similar to  $\text{Alpha}$  and  $\text{Beta}$ , are forward and backward transmitter binding rate,  $K_3$  and  $K_4$  the rate constants of G protein production and decay  $G$  is the fraction of activated G proteins;  $g = g_{max} * G^n / (G^n + K_D)$ , where  $K_D$  is the dissociation constant of potassium channel. The parameters used in the four types of receptors are largely the same as previous reports (3-7), with minor adjustments to match the results from our iontophoretic experiment. Moreover, the resting membrane resistance  $R_m$  was set to be non-uniform along the dendritic tree (8). Sodium channels were distributed with a largely constant

density along the somatodendritic axis (9). The A-type potassium channels differed in their kinetics between the proximal and distal populations, and their density increased progressively by more than 6-fold from the soma to a distance of 350  $\mu\text{m}$  along the apical trunk (10, 11). The density of hyperpolarization-activated cationic current ( $I_h$ ) increased by more than 6 folds from the soma to the distal dendrites (12). The distribution of AMPA receptors was set with a gradient along the dendrite to achieve a distance-dependent scaling property (13-16). Based upon the above experimental results, the parameters used in the model were set as follows: the peak sodium conductance  $g_{Na} = 30 \text{ mS/cm}^2$  in the soma and dendrites,  $g_{Na} = 60 \text{ mS/cm}^2$  in the axon;  $g_{Kd} = 5 \text{ mS/cm}^2$  (uniform distribution);  $g_{KA}^p(d) = g_{KA}^{p0} * (1 + d/70)$ , if the distance from the soma  $d \leq 100 \mu\text{m}$ ;  $g_{KA}^d(d) = g_{KA}^{d0} * (1 + d/70)$ , if  $100 < d \leq 350 \mu\text{m}$ ; and  $g_{KA}^d(d) = 6.5 * g_{KA}^{d0}$  if  $d > 350 \mu\text{m}$ , where  $g_{KA}^{p0} = g_{KA}^{d0} = 5 \text{ mS/cm}^2$ ;  $g_h(d) = g_{h0} + 9 * g_{h0} / [1.0 + \exp((300 - d)/50)]$ , where  $g_{h0} = 20 \mu\text{S/cm}^2$ ; the ratio of maximal NMDAR conductance to AMPAR conductance was of the form  $r_{NA} = 0.6 / (1 + d/300)$  for the dendrite located in the *stratum radiatum* and the ratio of GABA<sub>B</sub>R to GABA<sub>A</sub>R was set as 0.6.

The passive biophysical properties include:  $R_m = R_{m0} + (R_{mI} - R_{m0}) / [1.0 + \exp(-(d - 300)/50)]$ , where  $R_{m0} = 60 \text{ k}\Omega\text{cm}^2$  and  $R_{mI} = 20 \text{ k}\Omega\text{cm}^2$ ;  $R_i = 80 \Omega\text{cm}$ ;  $C_m = 1 \mu\text{F/cm}^2$ . The temperature was 34°C and the resting membrane potential was -70 mV. Reversal potentials were set as:  $E_{Na} = +55 \text{ mV}$ ,  $E_K = -90 \text{ mV}$ ,  $E_h = -30 \text{ mV}$ ,  $E_{AMPA} = E_{NMDA} = 0 \text{ mV}$ ,  $E_{GABAA} = -80 \text{ mV}$ ,  $E_{GABAB} = -90 \text{ mV}$ .

## SI Theoretical Analysis

To investigate the theoretical basis of the empirically derived arithmetic rule, we applied the two port analysis developed by Koch (1999) to a passive dendritic tree. In this analysis, the time-dependent aspects were not considered. The somatic voltage response ( $V_{se}$ ) to the

individual excitatory input at location  $e$  can be written as:

$$V_{se} = K_{es}g_e(E_{re} - V_e^e), \text{ and } V_e^e = K_{ee}g_e(E_{re} - V_e^e)$$

Where  $V_e^e$  is voltage change from resting potential and  $K_{ee}$  is the input resistance at location  $e$ ,  $K_{es}$  is the transfer resistance between location  $e$  and the soma,  $E_{re}$  is the difference between the reversal potential for the excitatory synaptic current and the resting membrane potential, and  $g_e$  is the excitatory synaptic conductance. Solving the above two equations, we arrive at

$$V_{se} = \frac{K_{es}g_e E_{re}}{1 + K_{ee}g_e} \quad (1)$$

Likewise, for the inhibitory input we obtained

$$V_{si} = \frac{K_{is}g_i E_{ri}}{1 + K_{ii}g_i} \quad (2)$$

For the somatic response to coincident excitatory and inhibitory inputs, we obtained

$$V_s = K_{es}g_e(V_e - E_{re}) + K_{is}g_i(V_i - E_{ri}),$$

where  $V_e = K_{ee}g_e(E_{re} - V_e) + K_{ie}g_i(E_{ri} - V_i)$  and  $V_i = K_{ii}g_i(E_{ri} - V_i) + K_{ei}g_e(E_{re} - V_e)$

The solution of the above equations can be expressed as (17):

$$V_s = \frac{K_{es}g_e E_{re} + K_{is}g_i E_{ri} + (K_{es}K_{ii} - K_{is}K_{ie})g_i g_e E_{re} + (K_{is}K_{ee} - K_{es}K_{ie})g_e g_i E_{ri}}{1 + K_{ee}g_e + K_{ii}g_i + (K_{ee}K_{ii} - K_{ie}^2)g_e g_i} \quad (3)$$

$K_{ee}g_e$ ,  $K_{ii}g_i$ ,  $K_{ie}g_e$ , and  $K_{ei}g_i$  have magnitudes on the order of  $10^{-2} \sim 10^{-1}$ , and satisfy the conditions  $K_{ee}g_e \ll 1$ ,  $K_{ii}g_i \ll 1$  and  $(K_{ee}K_{ii} - K_{ie}^2)g_e g_i \ll 1$ . Thus, Equations (1-3) can be

reduced by Taylor series expansion to yield

$$V_{se} \approx K_{es}g_e E_{re} (1 - K_{ee}g_e) \approx K_{es}g_e E_{re}$$

$$V_{si} \approx K_{is}g_i E_{ri} (1 - K_{ii}g_i) \approx K_{is}g_i E_{ri}$$

$$V_s \approx V_{se} + V_{si} - K_{ei} \left( \frac{1}{K_{es} E_{ri}} + \frac{1}{K_{is} E_{re}} \right) V_{se} V_{si}$$

By defining  $k = -K_{ei} \left( \frac{1}{K_{es} E_{ri}} + \frac{1}{K_{is} E_{re}} \right)$ , we obtained  $V_s \approx V_{se} + V_{si} + k V_{se} V_{si}$ . This equation has

the same form as the empirically derived arithmetic rule, for which  $V_s$ ,  $V_{se}$  and  $V_{si}$  correspond to Sum, EPSP and IPSP, respectively, in our empirically obtained arithmetic rule. Considering that  $E_{ri} \ll E_{re}$  and  $K_{es}$  and  $K_{is}$  are of the same order of magnitude,  $k$  is reduced to

$$k \approx \frac{K_{ei}}{K_{es} (-E_{ri})} \quad (4)$$

Note that  $E_{ri}$  is the difference between the reversal potential of the inhibitory current and the resting membrane potential, a value fixed at -10 mV in the simulations and experiments in the present study. The unit of  $k$  is  $\text{mV}^{-1}$ .

The transfer resistance between locations A and B ( $K_{AB}$ ) can be calculated by dividing the voltage change in location B by the magnitude of the injected current in location A. The  $K_{AB}$  value is smaller for more distant A and B. A qualitative analysis of Equation (4) for a given  $i$  location is as follows:

- (i) When  $e$  is proximal to  $i$ :  $K_{ei}$  becomes smaller and  $K_{es}$  becomes larger with increasing  $e-i$  distance, leading to a decreasing  $k$  with increasing  $e-i$  distance.
- (ii) When  $e$  is distal to  $i$ :  $K_{ei}$  and  $K_{es}$  decrease concurrently with increasing  $e$  distance from the soma, leading to a largely constant  $k$  for distal  $e$ .

Further simulation was carried out according to Equation (4), and the results (Fig. S5) indeed support the above qualitative analysis and agree with the asymmetric  $k$  profile found in both realistic modeling and experiments (Fig. 3).

## References:

1. Murnick JG, Dube G, Krupa B, & Liu G (2002) High-resolution iontophoresis for single-synapse stimulation. *J Neurosci Methods* 116(1):65-75.
2. Cannon RC, Turner DA, Pyapali GK, & Wheal HV (1998) An on-line archive of reconstructed hippocampal neurons. *J Neurosci Methods* 84(1-2):49-54.
3. Destexhe A, Mainen ZF, & Sejnowski TJ (1994) An efficient method for computing synaptic conductances based on a kinetic model of receptor binding. *Neural Computation* 6(1):14-18.
4. Destexhe A, Mainen ZF, & Sejnowski TJ (1994) Synthesis of models for excitable membranes, synaptic transmission and neuromodulation using a common kinetic formalism. (Translated from eng) *J Comput Neurosci* 1(3):195-230 (in eng).
5. Destexhe A, Mainen ZF, & Sejnowski TJ (1998) *Kinetic models of synaptic transmission* (MIT press, Cambridge).
6. Poirazi P, Brannon T, & Mel BW (2003) Arithmetic of subthreshold synaptic summation in a model CA1 pyramidal cell. *Neuron* 37(6):977-987.
7. Poirazi P, Brannon T, & Mel BW (2003) Pyramidal neuron as two-layer neural network. *Neuron* 37(6):989-999.
8. Stuart G & Spruston N (1998) Determinants of voltage attenuation in neocortical pyramidal neuron dendrites. *J Neurosci* 18(10):3501-3510.
9. Magee JC & Johnston D (1995) Characterization of single voltage-gated Na<sup>+</sup> and Ca<sup>2+</sup> channels in apical dendrites of rat CA1 pyramidal neurons. *J Physiol* 487:67-90.
10. Hoffman DA, Magee JC, Colbert CM, & Johnston D (1997) K<sup>+</sup> channel regulation of signal propagation in dendrites of hippocampal pyramidal neurons. *Nature* 387(6636):869-875.
11. Migliore M, Hoffman DA, Magee JC, & Johnston D (1999) Role of an A-type K<sup>+</sup> conductance in the back-propagation of action potentials in the dendrites of hippocampal pyramidal neurons. *J Comput Neurosci* 7(1):5-15.
12. Magee JC (1998) Dendritic hyperpolarization-activated currents modify the integrative properties of hippocampal CA1 pyramidal neurons. *J Neurosci* 18(19):7613-7624.
13. Magee JC & Cook EP (2000) Somatic EPSP amplitude is independent of synapse location in hippocampal pyramidal neurons. *Nat Neurosci* 3(9):895-903.
14. Andrasfalvy BK & Magee JC (2001) Distance-dependent increase in AMPA receptor number in the dendrites of adult hippocampal CA1 pyramidal neurons. *J Neurosci* 21(23):9151-9159.
15. Smith MA, Ellis-Davies GC, & Magee JC (2003) Mechanism of the distance-dependent scaling of Schaffer collateral synapses in rat CA1 pyramidal neurons. *J Physiol* 548:245-258.
16. Nicholson DA, Trana R, Katz Y, Kath WL, Spruston N, Geinisman Y (2006) Distance-dependent differences in synapse number and AMPA receptor expression in hippocampal CA1 pyramidal neurons. *Neuron* 50(3):431-442.
17. Koch C (1999) In *Biophysics of computation*, ed Koch C (Oxford University Press, New York).
